# Supplementary material for: Analysis of nine N-nitrosamines using liquid chromatography-accurate mass high resolution-mass spectrometry on a Q-Exactive instrument
Source: Royal Society of Chemistry journal article supplement (doi:10.1039/c4ay02967d), 2015-01-01
Supplement: c4ay02967d1.pdf [file c4ay02967d1.pdf]

## **Analysis of nine N-nitrosamines using Liquid Chromatography-Accurate Mass High Resolution-Mass Spectrometry on a Q-Exactive instrument**

Arnaud Djintchui Ngongang, Sung Vo Duy, Sébastien Sauvé\*

Department of Chemistry, Université de Montréal, CP 6128 Centre-ville, Montréal, H3C 3J7 QC, Canada.

\*Corresponding author

Phone: +1 514 343-6749. Fax: +1 514 343-7586. E-mail: [sebastien.sauve@umontreal.ca](mailto:sebastien.sauve@umontreal.ca).

**Supplementary**

**Information**

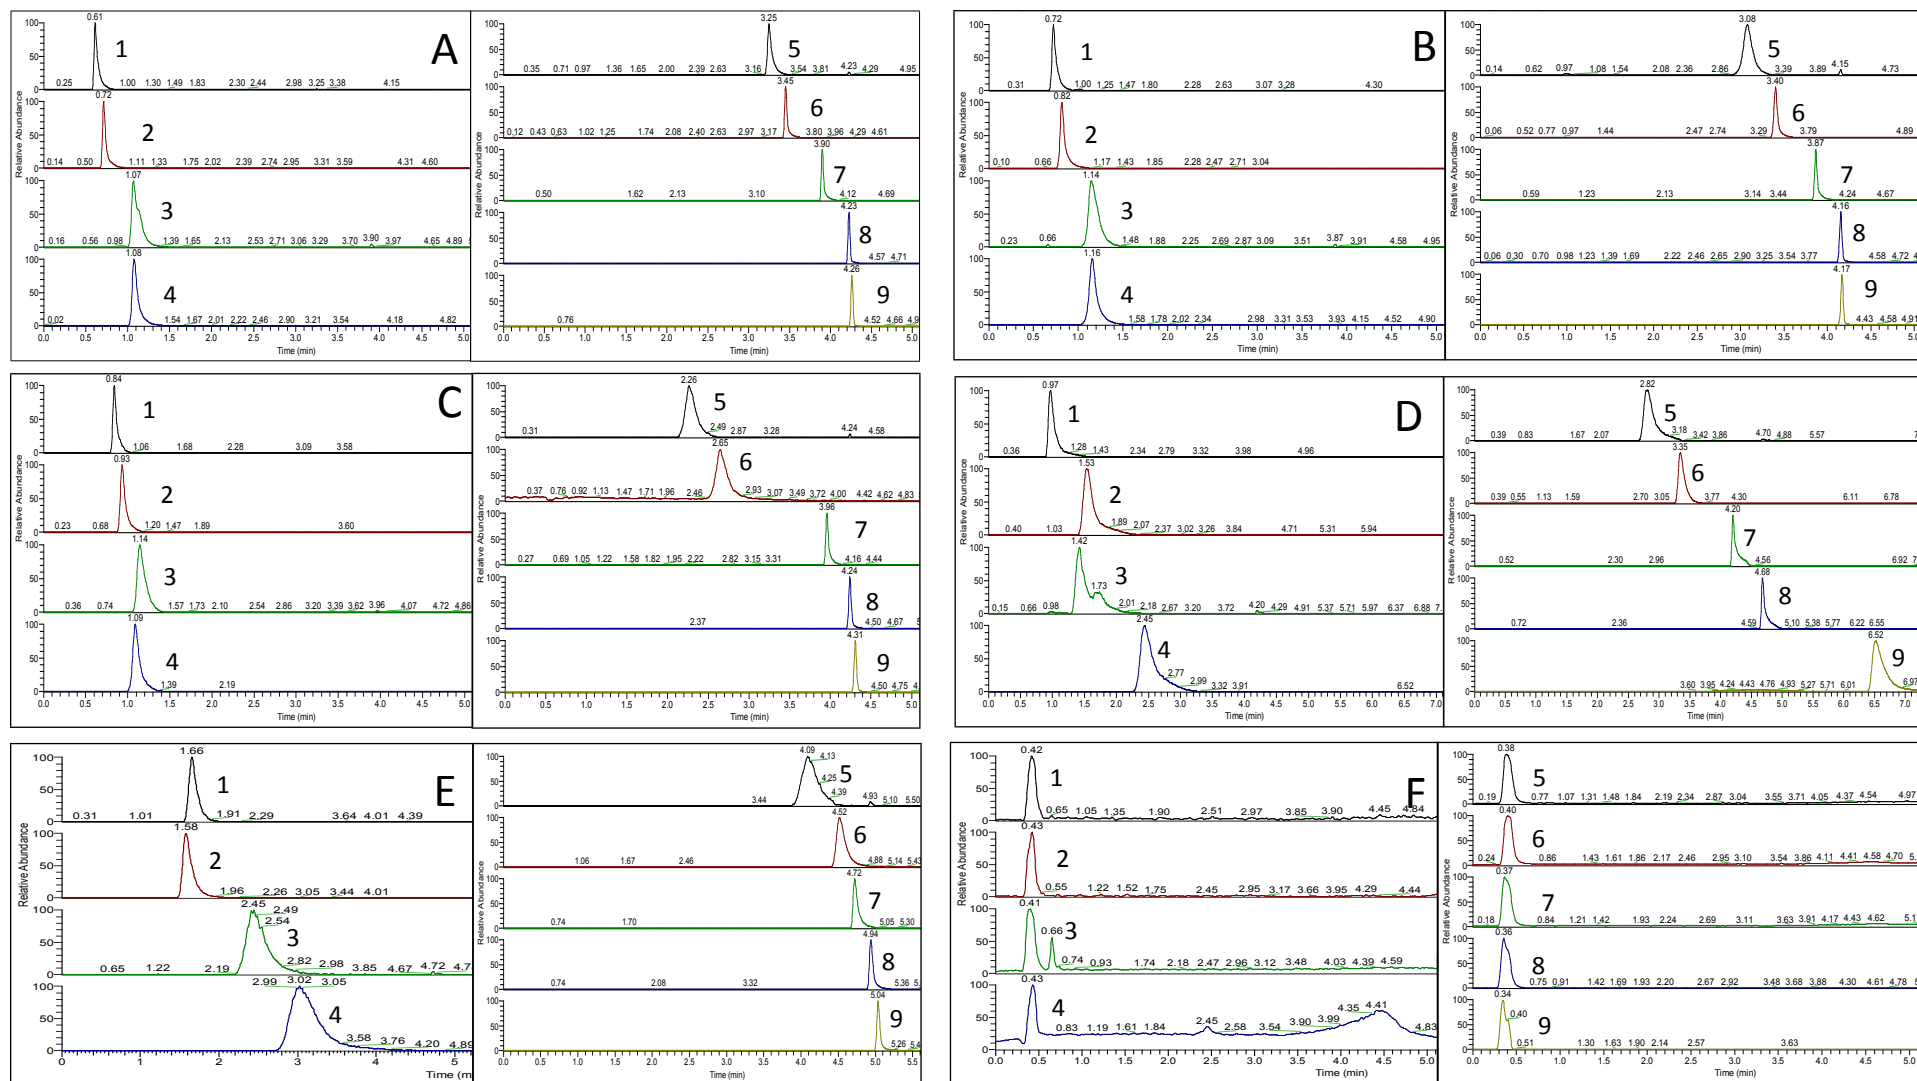

Fig. S1. Chromatograms recorded for the six tested chromatographic columns. A = C18; B = C8; C = PFP; D = Hypercarb; E = Amide 80 and F = Hilic. 1. NDMA, 2. NMor, 3. NMEA, 4. NPyr, 5. NDEA, 6. NPip, 7. NDPA, 8. NDBA, 9. NDPhA.

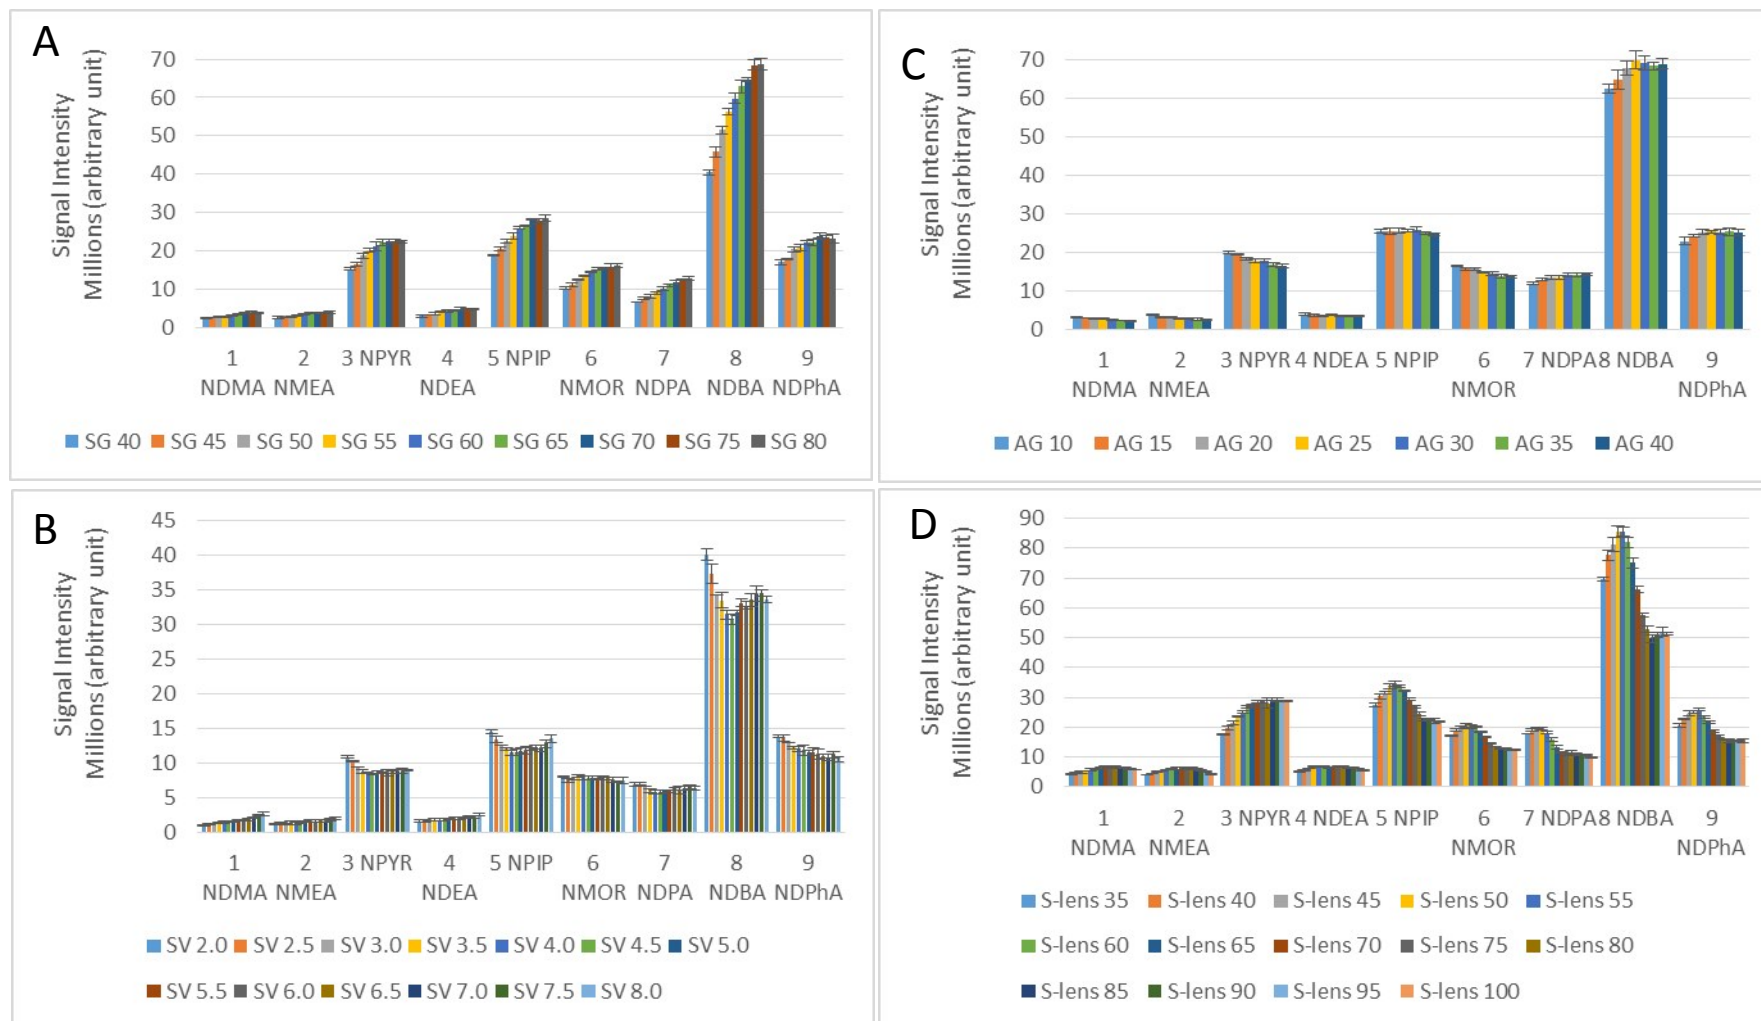

Fig. S2. Experimental results obtained by varying the sheath gas (A), the spray voltage (B), the auxiliary gas (C) and the S-Lens RF Level (D). Errors bars are standard deviations of three replicates.

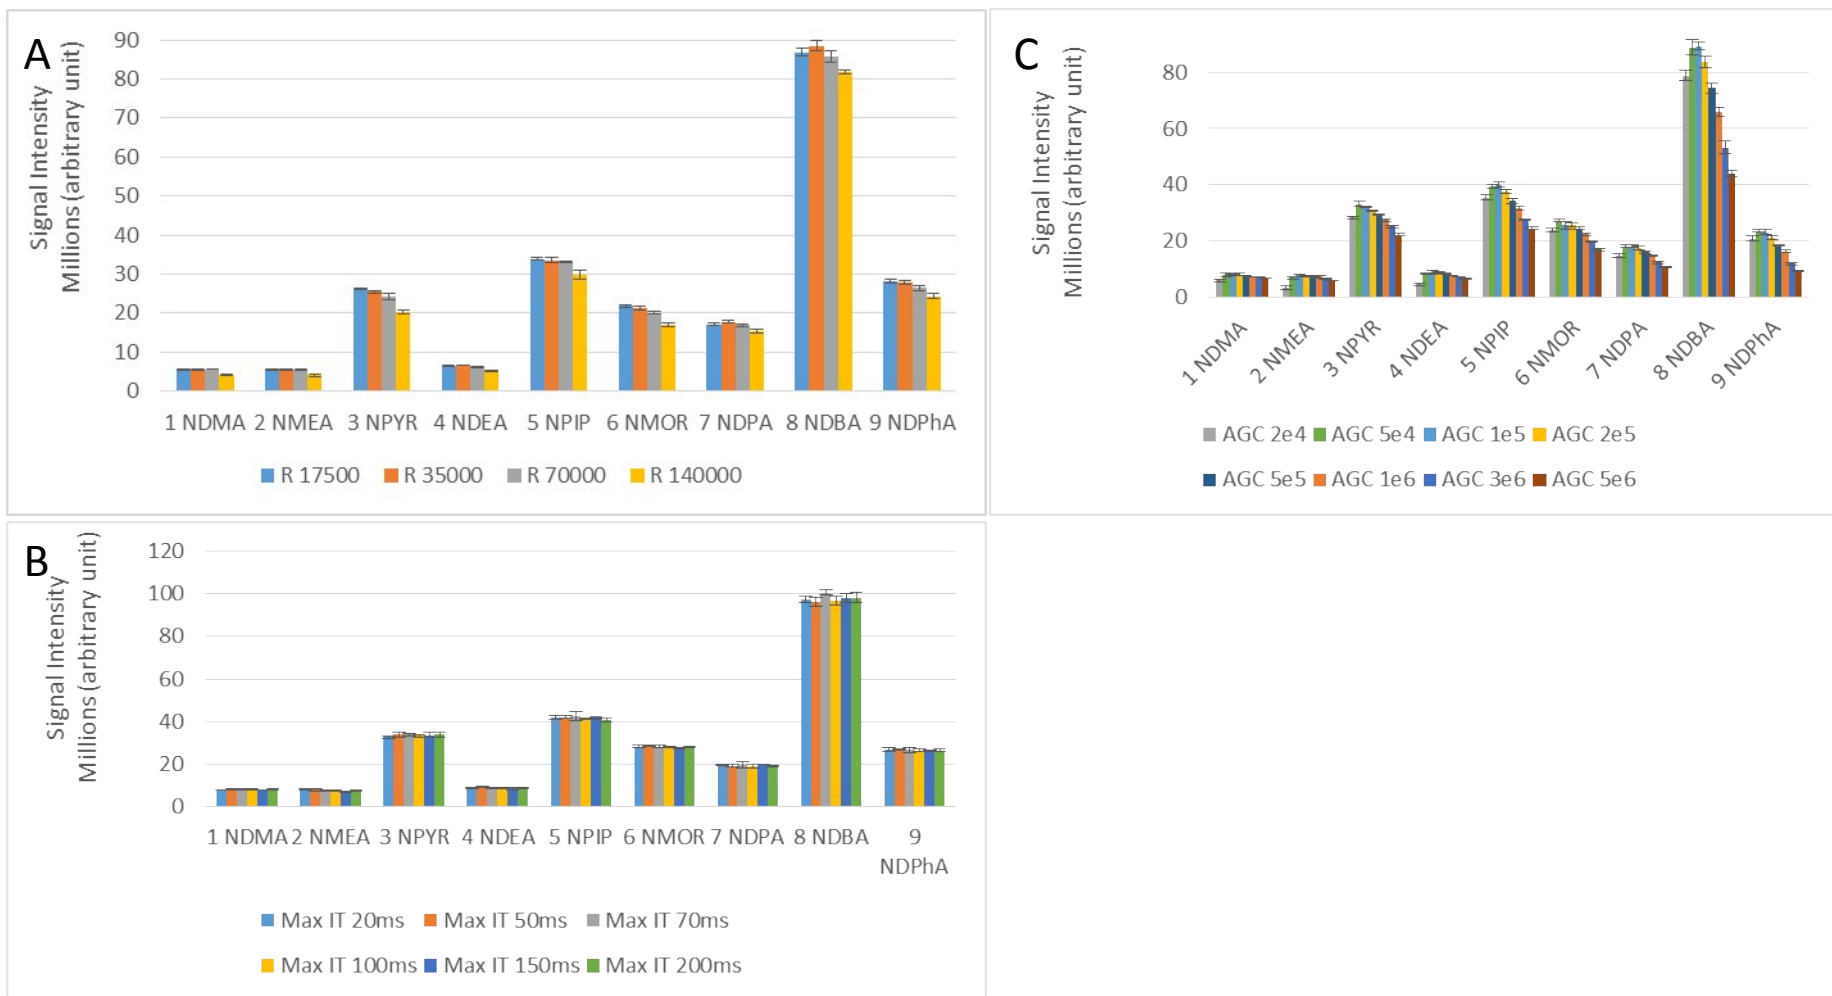

Fig. S3. Experimental results obtained by varying the resolution (A), the maximum injection time (B) and the automatic gain control (C). Errors bars are standard deviations of three replicates.
